# Supplementary material for: Analysis of European Medicines Agency’s COVID-19 Vaccine Information Materials in EU and Regional Context
Source: Preprints.org preprint supplement (doi:10.20944/preprints202308.0966.v1), 2023-08-14
Supplement: Supplementary file 4 [file supplementary]

**Questionario sulla Valutazione delle Pagine Web EMA sullo sviluppo e le caratteristiche  
dei Vaccini COVID**

**1. Lei è un (selezioni 1-2 opzioni):**

- Popolazione generale
- Membro di organizzazioni di pazienti
- Membro di organizzazioni di operatori sanitari
- Operatore sanitario individuale
- Ex COVID-19 Positivo

**Se altro specifichi** \_\_\_\_\_

**2. Prima di leggere il materiale dell'EMA riguardante i vaccini contro COVID-19, quanto sarebbe disposto a vaccinarsi contro COVID-19, una volta che la vaccinazione sia disponibile e accessibile per lei?: 1= molto improbabile; 7: molto probabile**

**3. Dove cerca solitamente informazioni riguardanti i vaccini contro COVID-19? (Selezioni tutte le opzioni possibili)**

- Il suo medico di famiglia/PLS
- Farmacista di comunità
- Infermiere
- Leader di comunità
- Agenzia Europea del farmaco (EMA)
- Agenzia Italiana del farmaco (AIFA)
- Riviste scientifiche
- Ministero della Salute
- La sua famiglia, colleghi e/o amici
- Motori di ricerca (google, bing, ecc...)
- Giornali (stampati o online)
- Organizzazione Mondiale della Sanità (WHO)
- Centro Europeo per la prevenzione e il controllo delle malattie (ECDC)
- Social network (Facebook, instagram, twitter ecc...)
- Altro
- Non sa dove cercare

**Se altro specifichi** \_\_\_\_\_

**4. L'inglese è la sua lingua?**

- Sì
- No

**5. Se ha risposto di no, la lingua utilizzata rappresenta un ostacolo per la comprensione del documento?**

- Sì
- No

6. Come può l'EMA garantire che i vaccini contro COVID-19 siano sicuri ed efficaci (seleziona tutte le opzioni possibili)
- Applicando gli stessi standard elevati come per qualsiasi altro farmaco
  - Garantendo che tutti gli studi siano effettuati correttamente
  - Rivedendo i dati degli studi più velocemente ma con attenzione
  - Con il supporto di una task force di esperti dedicata
  - Soltanto gli studi su esseri umani volontari, eliminando gli studi sugli animali
7. Vero o falso: i requisiti di sicurezza riguardanti i vaccini contro COVID-19 sono gli stessi a qualsiasi altro vaccino autorizzato in UE e non sono stati più bassi in periodo pandemico
- Vero
  - Falso
8. Vero o falso: l'EMA effettua una valutazione scientifica riguardante la sicurezza, l'efficacia e la qualità del vaccino, prima di concludere che il vaccino possa essere approvato.
- Vero
  - Falso
9. Una volta letto il documento "vaccini contro COVID-19: caratteristiche principali" (DOCUMENTO 1), ha trovato le informazioni chiare e utili?: 1=confuse e per niente utili. 7=molto chiare e utili
10. Potrebbe ora dare un punteggio alle seguenti categorie: da 1 (per niente) a 7 (assolutamente), in base alla sua esperienza con il documento?
- sono state fornite abbastanza informazioni per capire le caratteristiche principali
  - la lingua e i vocaboli utilizzati nel documento sono facili da comprendere
  - la lettura del documento ha incrementato le sue conoscenze riguardanti i vaccini contro COVID-19?
11. Dopo aver letto "vaccini contro COVID-19: caratteristiche principali", quanto sarebbe disposto a vaccinarsi contro COVID-19 una volta che un vaccino sarà disponibile e sarà per lei accessibile?  
1= molto improbabile; 7: molto probabile
12. Clicchi sul seguente link dove è stato pubblicato come pagina web il documento "vaccini contro COVID-19: caratteristiche principali": <https://www.ema.europa.eu/en/human-regulatory/overview/public-health-threats/coronavirus-disease-covid-19/treatments-vaccines/covid-19-vaccines-key-facts> Oltre a una pagina web, potrebbe esserle utile avere queste informazioni in un altro formato condivisibile?
- Sì
  - No
  - Non lo so

Se altro specifichi \_\_\_\_\_

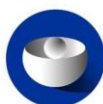

EUROPEAN MEDICINES AGENCY  
SCIENCE MEDICINES HEALTH

***Il secondo documento: “vaccini contro COVID-19: sviluppo, valutazione, approvazione e monitoraggio” (DOCUMENTO 2) è un documento più dettagliato. Se non è un paziente o un operatore sanitario, la lettura del secondo documento e il completamento della seconda parte dell'indagine è facoltativa. Se lo ha letto, selezioni “Sì” per continuare il questionario.***

- Sì
- No

**13. Quando viene monitorata la sicurezza dei vaccini?**

- Solo durante le fasi 1-3 degli studi clinici sull'uomo
- Solo quando il vaccino è approvato
- Attraverso tutte le fasi di sviluppo clinico del vaccino, anche dopo l'approvazione e quando i vaccini sono utilizzati nella popolazione
- Mai

**14. Cos'è una “rolling review”?**

- Un processo di revisione rapido e rigoroso che l'EMA sta attualmente conducendo durante l'emergenza di sanità pubblica per una rapida valutazione dei medicinali contro COVID-19
- Una revisione fatta dalle aziende farmaceutiche che hanno fatto i vaccini
- Una revisione normalmente effettuata dall'EMA quando non ci sono pandemie in corso.

**15. Quali delle seguenti opzioni aiuta lo sviluppo dei vaccini contro COVID-19?**

- Dialogo precoce tra sviluppatori ed esperti normativi
- Associando più fasi della sperimentazione clinica quando non è compromessa la sicurezza
- Utilizzando le conoscenze sulla sicurezza ed efficacia dei vaccini già disponibili sul mercato
- Aumentando la capacità di produzione
- Tutte le seguenti sono corrette
- Nessuna delle seguenti è corretta

**16. Per quanto riguarda l'equilibrio rischio-beneficio sono vere le seguenti affermazioni. Quale dichiarazione pensa ribadisca con più chiarezza che i vaccini, come tutti farmaci, hanno benefici e rischi?**

- Come ogni farmaco i vaccini hanno benefici e rischi, e le condizioni di autorizzazione all'immissione al commercio mira a massimizzare i benefici e minimizzare i rischi
- Come ogni farmaco i vaccini hanno benefici e rischi, e nonostante l'alta efficacia nessun vaccino è efficace al 100% nel prevenire una malattia o nessun vaccino ha il 100% di sicurezza per tutte le persone vaccinate

**17. Dopo aver letto “vaccini contro COVID-19: sviluppo, valutazione, approvazione e monitoraggio” ha trovato le informazioni chiare e utili?: 1=confuse e per niente utili. 7=molto chiare e utili**

**18. Potrebbe dare un punteggio alle seguenti categorie da 1 (per niente) a 7 (assolutamente) in base alla sua esperienza con il documento?:**

- sono state fornite abbastanza informazioni per capire i messaggi principali
- i grafici aiutano a trasmettere i concetti principali
- la lingua e i vocaboli usati nel documento sono semplici da capire
- l'aver letto il documento ha incrementato le sue conoscenze sui vaccini contro COVID-19?

19. Dopo aver letto “vaccini contro COVID-19: sviluppo, valutazione, approvazione e monitoraggio” sarebbe disposto a vaccinarsi contro COVID-19 una volta che diventi disponibile un vaccino?  
1=molto improbabile. 7=molto probabile
20. Guardi cortesemente le due figure riportate sotto per mezzo minuto. Pensa che esse siano chiare e facili da comprendere?

Resources figures

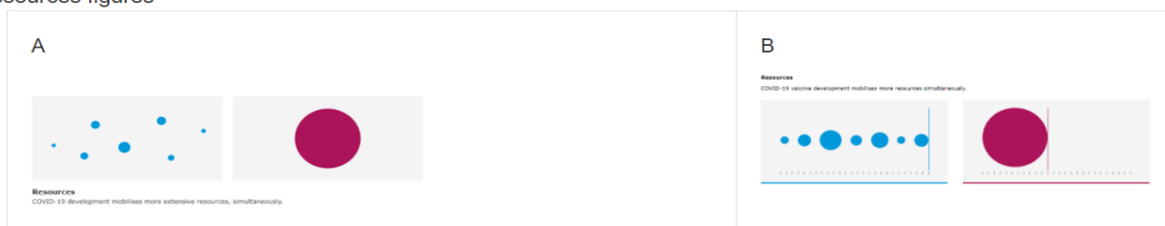

- Si
- No
- Non lo so

21. Se ha risposto sì, quale tra le due figure preferisce?

- A
- B

Se ha qualche suggerimento riguardante le figure presentate nel documento lo scriva di seguito \_\_\_\_\_

22. Esamini le 3 figure per mezzo minuto. Pensa che esse siano chiare e facili di capire?

Benefit-risk balance figures

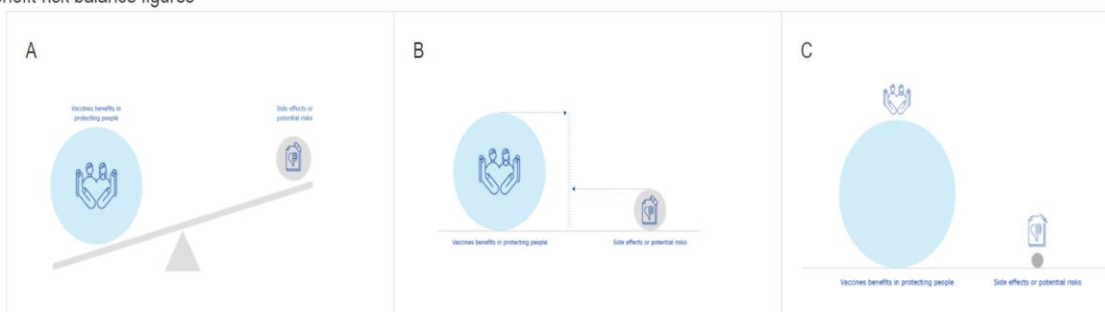

- Si
- No
- Non lo so

23. Se ha risposto sì, quale immagine preferisce?

- A
- B
- C

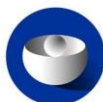

EUROPEAN MEDICINES AGENCY  
SCIENCE MEDICINES HEALTH

**24. Se ha qualche suggerimento per qualche immagine presentata nel documento, lo scriva di seguito:**

---

**25. Pensa che manchi qualche informazione riguardante i vaccini contro COVID-19? Lo spieghi di seguito**

---

**Se ha suggerimenti o commenti riguardo qualche parte dei documenti, li scriva di seguito. I documenti hanno linee e pagine numerate, quindi è più semplice identificare una parte specifica.**

---

---

---

---
