# Supplementary material for: Analysis of European Medicines Agency’s COVID-19 Vaccine Information Materials in EU and Regional Context
Source: Preprints.org preprint supplement (doi:10.20944/preprints202308.0966.v1), 2023-08-14
Supplement: Supplementary file 7 [file supplementary]

20 November 2020  
EMA/519954/2020

# COVID-19 vaccines in the EU

## *Development, scientific evaluation, approval and monitoring*

**The European Medicines Agency (EMA) plays an important role in enabling the development, scientific evaluation, approval and monitoring of COVID-19 vaccines in the European Union (EU).**

### I. Development of COVID-19 vaccines

- COVID-19 vaccines are being developed according to current regulatory guidelines and legal requirements. Like all medicines (Figure 1), COVID-19 vaccines are first tested in the laboratory (e.g. studies on their pharmaceutical quality and studies to check first the effects in laboratory tests and animals). Then vaccines are tested in human volunteers in studies called clinical trials. These tests help confirm how the vaccines work and, importantly, to evaluate their safety and protective efficacy.

**Figure 1: Overview of vaccine development and approval stages**

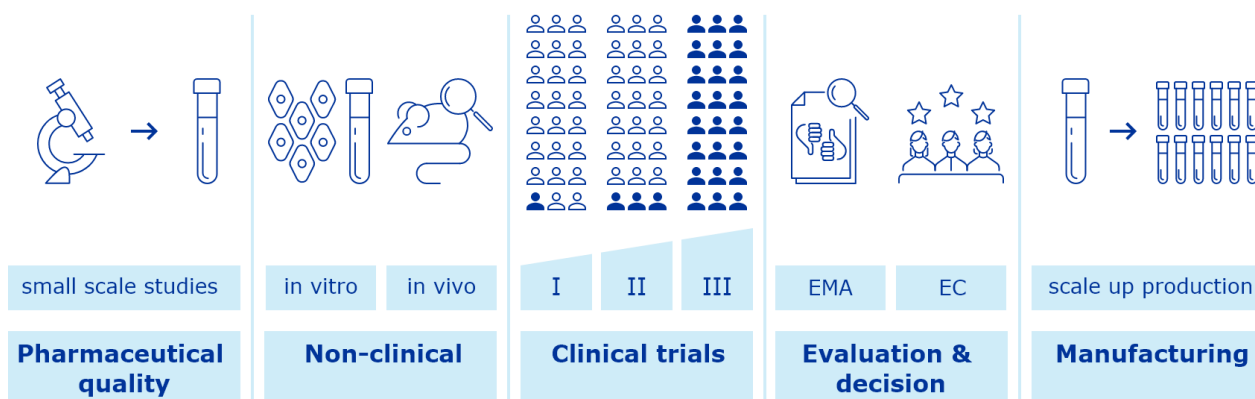

## Standard vaccine development

- Standard vaccine development is a long process (Figure 2a) and studies are done in sequential steps; companies first make small batches and do small scale studies to characterise/optimize the production process. Studies are performed to determine a suitable formulation that can keep vaccine components stable to the end of its shelf life. Then the company decides whether to continue development and scale up production. A suitable and effective quality control strategy is developed to assure that the vaccine meets its intended quality profile and complies with regulatory standards.
- Studies on pharmaceutical quality look at the individual vaccine components, the final formulation to be used and at the whole manufacturing process in detail.
- More studies are done in laboratory models, using in vitro studies or animal models (in vivo studies), to show how the vaccine triggers an immune response and works to prevent infection.
- Finally, the vaccine developer studies the vaccine in three phases of clinical trials, with larger numbers of volunteers in each phase:
  - **Human pharmacology studies (or Phase I trials)** generally study between 20 - 100 healthy volunteers to confirm that the medicine behaves as expected from laboratory tests. For instance: Does the vaccine trigger the expected immune response? Is the vaccine safe to move into larger studies? Which doses can be adequate?
  - **Therapeutic exploratory studies (or Phase II trials)** are done in several hundred volunteers and study the best doses to use, the most common side effects and how many doses are needed. These studies also check that the vaccine triggers a good immune response in a broader population. In certain cases, it could also provide some preliminary indications of how well the vaccine will work (efficacy).
  - **Clinical efficacy and safety studies (Phase III trials)** include thousands of volunteers and show how efficacious the vaccine is at protecting against the infection compared with placebo (dummy) or alternative treatment and what are the less common side effects in those receiving the investigational vaccine. Measures of how efficacious the vaccine is could be reduction in the number of people with symptoms, reduction in the number of people with severe disease or reduction in the number of people diagnosed with the infection.
- Clinical trials in the EU, including those for COVID-19 vaccines, are authorised and managed at national level. National competent authorities and ethics committees ensure that studies are scientifically sound and conducted in an ethical manner.

**Figure 2: Indicative timelines for COVID-19 vaccines compared with standard vaccines**

## 2a. Standard vaccines

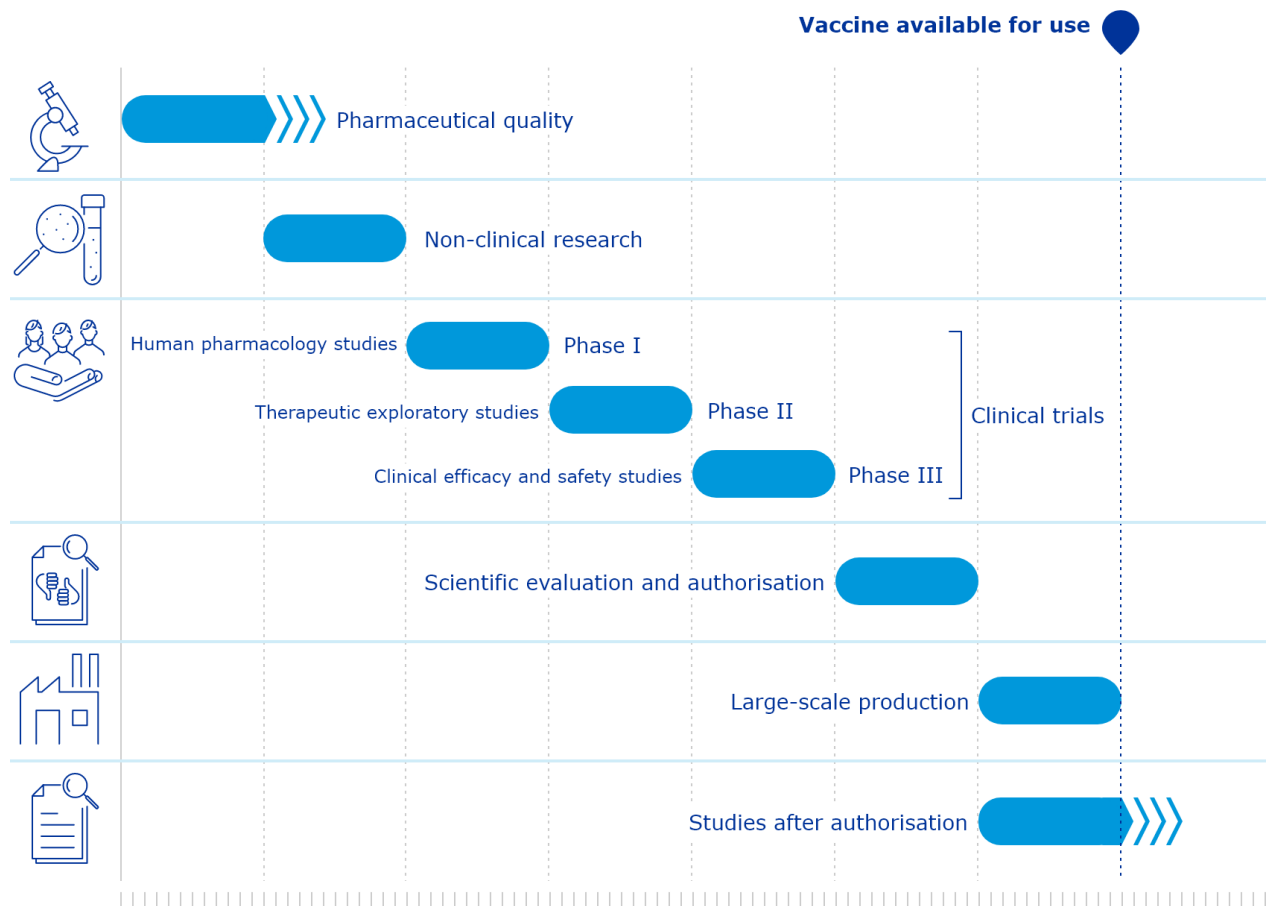

## Fast-track vaccine development in a public health emergency

- Due to the public health emergency, vaccine development for COVID-19 vaccines is being fast-tracked globally (Figure 2b).
- This implies that development is compressed in time, applying the extensive knowledge on vaccine production gained with existing vaccines. Companies may use different approaches to reduce timelines, for example:
  - mobilise more extensive human resources simultaneously, allowing them to analyse results from earlier studies more quickly and map out next steps in terms of resources, funding and regulatory strategy;
  - combine clinical trial phases or conduct some studies in parallel, instead of carrying them out sequentially, where it is safe to do so;

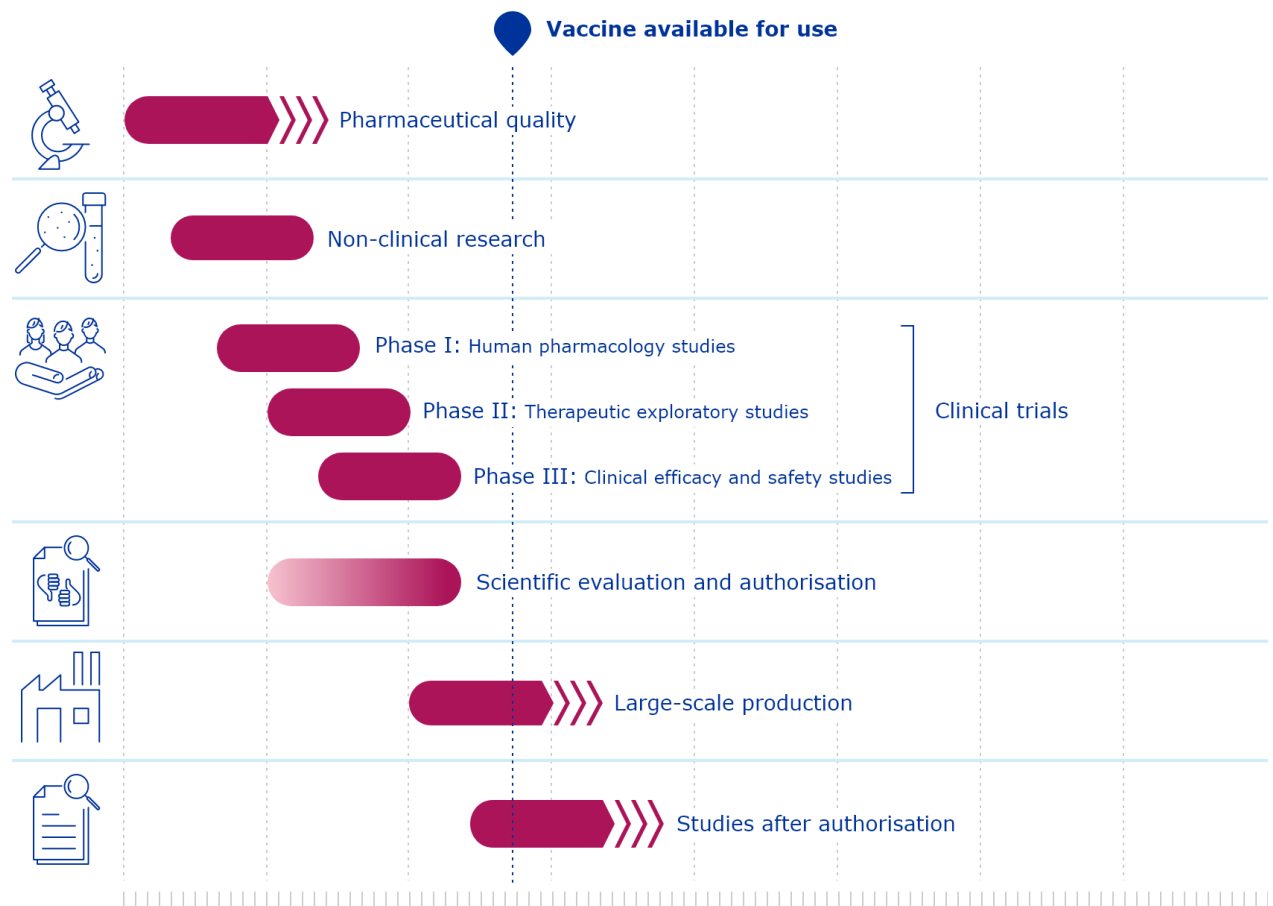

73

74 • Early scientific advice from regulators also helps speed up development:

- 75 – In the case of COVID-19 vaccines the Agency is having early and continuous dialogue with
- 76 companies whose vaccines are considered of high public health priority, so that they can
- 77 receive and implement any regulatory advice on planned studies as they go along, to ensure
- 78 studies are well designed and meet regulatory criteria.
- 79 – In the EU, for each COVID-19 vaccine under development, early dialogue takes place between
- 80 EMA and individual companies to discuss the strategy for evidence-generation. This is done
- 81 through EMA’s [COVID-19 Task Force](#) (ETF) and its scientific advice process.
- 82 – Advising companies on regulatory requirements helps to ensure that standards of quality,
- 83 safety and efficacy are embedded early in the process and are not compromised by fast-track
- 84 development. COVID-19 vaccines can only be approved and used if they comply with all the
- 85 requirements of quality, safety and efficacy set out in the EU pharmaceutical legislation.
- 86 – EMA is offering [rapid scientific advice](#) to vaccine developers so they can receive prompt
- 87 guidance and direction on the best methods and study designs to generate robust data on how
- 88 well a medicine or vaccine works, how safe it is, as well as on the manufacturing and control
- 89 process to establish its quality.

90 • In parallel to fast tracking development, companies are expanding manufacturing capacity and

91 large-scale production, to facilitate vaccine deployment without further delay once approved. In

the EU, this is further encouraged because the European Commission has provided support to facilitate vaccine development and deployment as quickly as possible:  
[https://ec.europa.eu/info/sites/info/files/communication-eu-strategy-vaccines-covid19\\_en.pdf](https://ec.europa.eu/info/sites/info/files/communication-eu-strategy-vaccines-covid19_en.pdf)

- The Agency is not involved in providing incentives to vaccine developers working on COVID-19 vaccines other than enabling access to regulatory procedures, (e.g. free scientific advice during vaccine development: <https://www.ema.europa.eu/en/news/covid-19-developers-medicines-vaccines-benefit-free-scientific-advice>). In addition, EMA has no role in negotiating potential vaccine availability, funding and deployment at EU or national level.

**Figure 3: Key components of vaccine development - standard vaccines compared with COVID-19 vaccines**

Standard vaccines  
COVID-19 vaccines

**Regulatory standards**

COVID-19 vaccines must be approved according to the same standards that apply to all medicines in the EU.

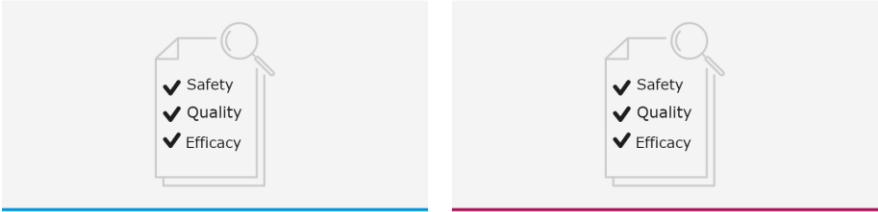

**Development**

COVID-19 development is compressed in time, applying the extensive current knowledge on vaccine development.

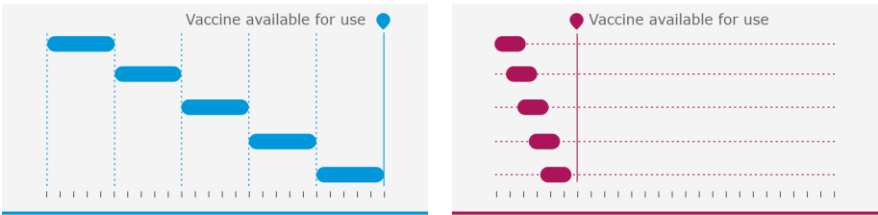

**Resources**

COVID-19 development mobilises more extensive resources, simultaneously.

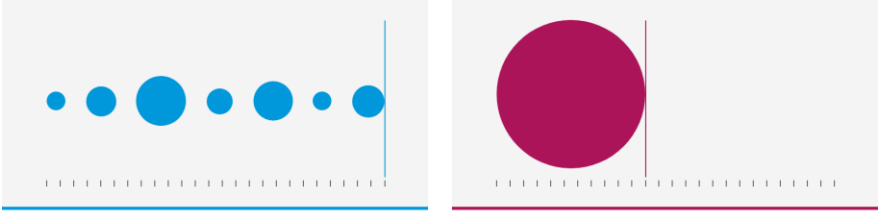

**Continuous dialogue**

COVID-19 vaccines are supported by early and continuous dialogue between the developers and the enhanced group of regulatory experts.

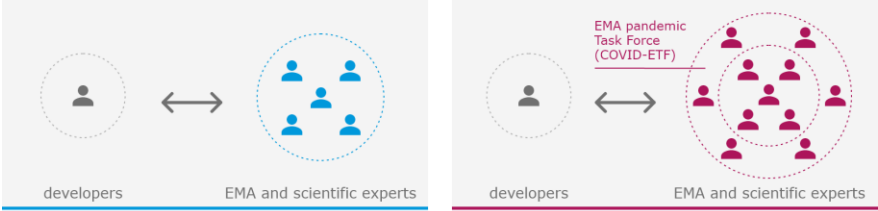

**Manufacturing**

Companies are expanding manufacturing capacity and large-scale production, to ensure efficient vaccine deployment.

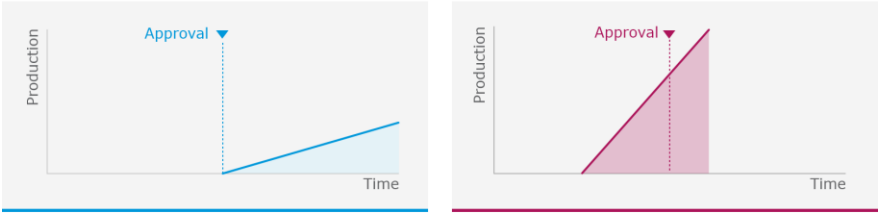

105 **II. Scientific evaluation and approval process for COVID-19 vaccines**

- 106 • COVID-19 vaccines must be approved according to the same standards of pharmaceutical quality,  
107 safety and efficacy that apply to all medicines in the EU. These standards are reflected in the EU  
108 pharmaceutical law, which all companies developing vaccines must follow, and they will not be  
109 lowered in the pandemic context.

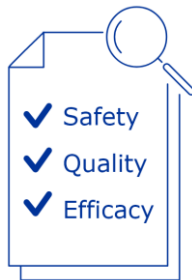

- 110  
111 • In view of the pandemic, EMA and regulatory agencies in Europe are diverting resources to speed  
112 up processes and reduce timelines for the evaluation and authorisation of COVID-19 vaccines.

113 ***Robust regulatory framework and scientific expertise in the EU***

- 114 • The EU's robust pharmaceutical legislation ensures that vaccines are only approved after scientific  
115 evaluation of their quality, safety and efficacy has demonstrated that their overall benefits  
116 outweigh their risks (Figure 4).  
117 • For COVID-19 vaccines, this evaluation needs to show that a vaccine's benefits in protecting people  
118 against COVID-19 are far greater than any side effect or potential risks.

119  
120 **Figure 4. Vaccines' benefits outweigh their side effects or potential risks**

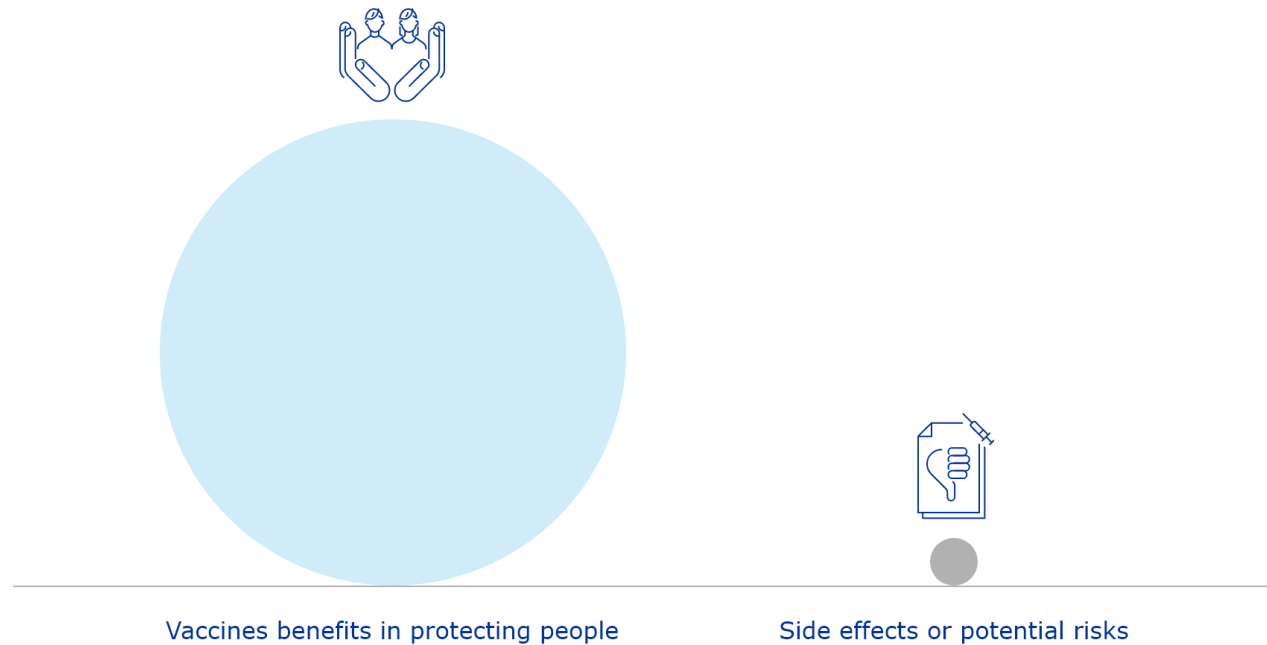

- The Agency (EMA) takes care to ensure that scientific experts evaluating medicines do not have any financial or other interests that could affect their impartiality. This is done by applying restrictions if competing interests are considered to potentially impact the impartiality of individual experts: <https://www.ema.europa.eu/en/about-us/how-we-work/handling-competing-interests>
- Independence of EMA's scientific evaluations is safeguarded also by a high level of transparency, which opens EMA's scientific evaluation work to public scrutiny. For COVID-19 medicines, the Agency will apply the highest level of transparency ever provided for medicines. [Exceptional transparency measures](#) have been put in place to meet an unprecedented public demand for information, support and make global research more efficient and allow public scrutiny and independent review.

### ***Scientific evaluation and approval processes***

- To gain marketing approval for a vaccine in the EU (Figure 5), the vaccine developer submits the results of all testing/investigations to the medicines regulatory authorities in Europe as part of a 'marketing authorisation' application.
- Most COVID-19 vaccines in the EU will be evaluated by EMA (via the 'centralised procedure'). Any vaccine produced using biotechnology will be evaluated by this route.
- EMA's evaluations are carried out by its expert scientific committees on human medicines (the CHMP and PRAC), made up of experts working in national medicines' regulatory agencies.
- As for all medicines, EU law requires that the initial evaluations are carried out separately by two different teams (Rapporteur and Co-Rapporteur) and reviewed by EMA's human medicines committee (CHMP) as a whole, to ensure a balanced view. For more information see: <https://www.ema.europa.eu/en/from-lab-to-patient-timeline>.
- To streamline and focus the work of the Committees and related Working Parties on medicines for the pandemic, EMA has set up a multi-disciplinary COVID-19 specific working group, the [COVID-19 Task Force](#) (ETF) bringing together key experts of the European medicines regulatory network, including with experts on infectious diseases, clinical trials and vaccines safety and manufacture, to ensure a fast and coordinated response to the COVID-19 pandemic.
- The review by EMA results in a scientific opinion which is then sent to the EC, which ultimately grants an EU-wide marketing authorisation in case of a positive outcome.
- As part of the approval process, regulators may carry out inspections to further assure that the information the vaccine developer provides has been quality assured and generated in strict compliance with regulatory standards, and that the studies have been carried out as described. This is always done for new manufacturing sites.
- Only after regulatory approval and thorough quality control, can a COVID-19 vaccine be introduced into national healthcare systems and used to protect people. The details for such national processes may be different for each member state.



**Figure 5. Evaluation and approval steps for COVID-19 vaccines**

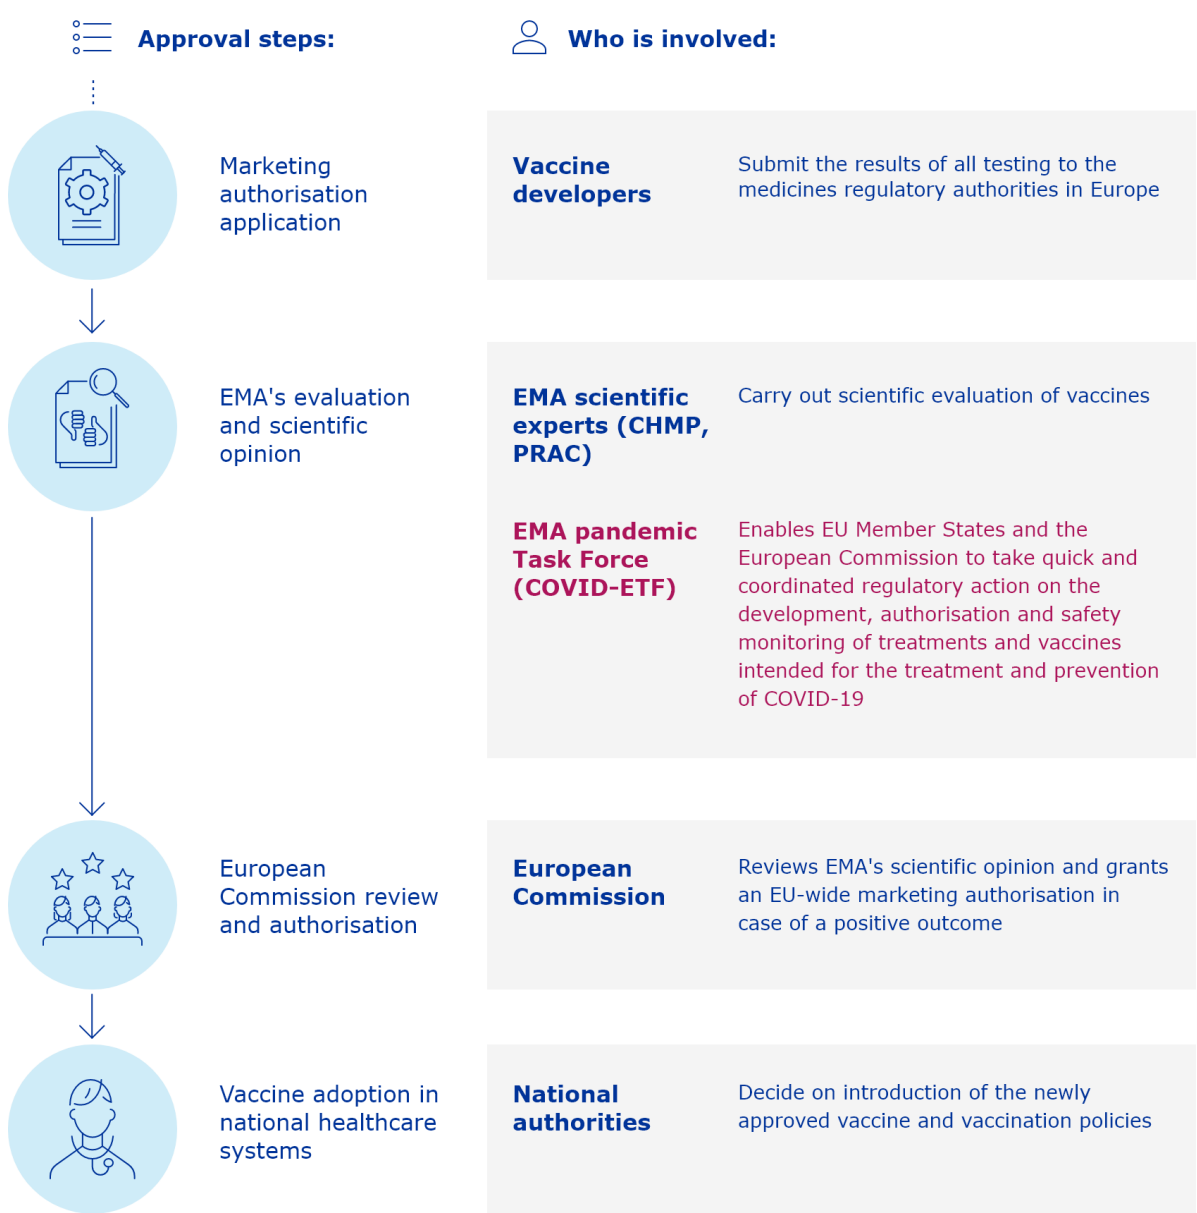

161

162

- 163 • Each batch of vaccine released onto the EU market is always tested prior to release. Stringent  
164 testing is done by the company holding the marketing authorisation and batches must meet the  
165 corresponding specifications approved by authorities.
- 166 • For vaccines to be used in public health immunisation programmes, such as those that may be  
167 approved via EMA for COVID-19, an additional independent control for each batch of vaccine,  
168 performed by an official medicines control laboratory (OMCL), is normally required before the  
169 company can market the respective batch: [https://www.edqm.eu/en/batch-release-human-](https://www.edqm.eu/en/batch-release-human-biologicals-vaccines-blood-and-plasma-derivatives)  
170 [biologicals-vaccines-blood-and-plasma-derivatives](https://www.edqm.eu/en/batch-release-human-biologicals-vaccines-blood-and-plasma-derivatives).
- 171 • This independent control is referred to as Official Control Authority Batch Release (OCABR) and  
172 includes testing of agreed quality parameters and a careful review of the compliance of the  
173 manufacturer's own test results.

## Accelerated evaluation for approval

- The EU legislation and procedures provide several tools that can be used in the event of an emerging threat or outbreak, mainly to expedite evaluation of potential vaccines.
- According to the EU pharmaceutical legislation, the standard timeline for the evaluation of a medicine is a maximum of 210 active days. However, for COVID-19 medicines, EMA is applying an expedited procedure called rolling review.

### Rolling review

- ✓ This procedure (Figure 6), used in a public health emergency, allows EMA to assess data for a promising medicine as soon as they become available on a rolling basis.
- ✓ In normal circumstances, all data supporting a marketing authorisation application must be submitted at the start of the evaluation procedure. In the case of a rolling review, leads for the evaluation (rapporteurs) are appointed whilst development is still ongoing and the Agency reviews data as they become available.
- ✓ Several rolling review cycles can be carried out during the evaluation of a vaccine as data continue to emerge, with each cycle lasting at least two weeks, depending on the amount of data to be assessed.
- ✓ Once the data package is considered complete, a developer can submit a formal marketing authorisation application to EMA, which can then be processed very quickly, because most of the data have already been reviewed during the rolling process.
- ✓ How long a rolling review will take can be difficult to predict, as it will depend on many factors such as the robustness of data presented by the company.

**Figure 6: Standard evaluation process compared with rolling review of COVID-19 vaccines**

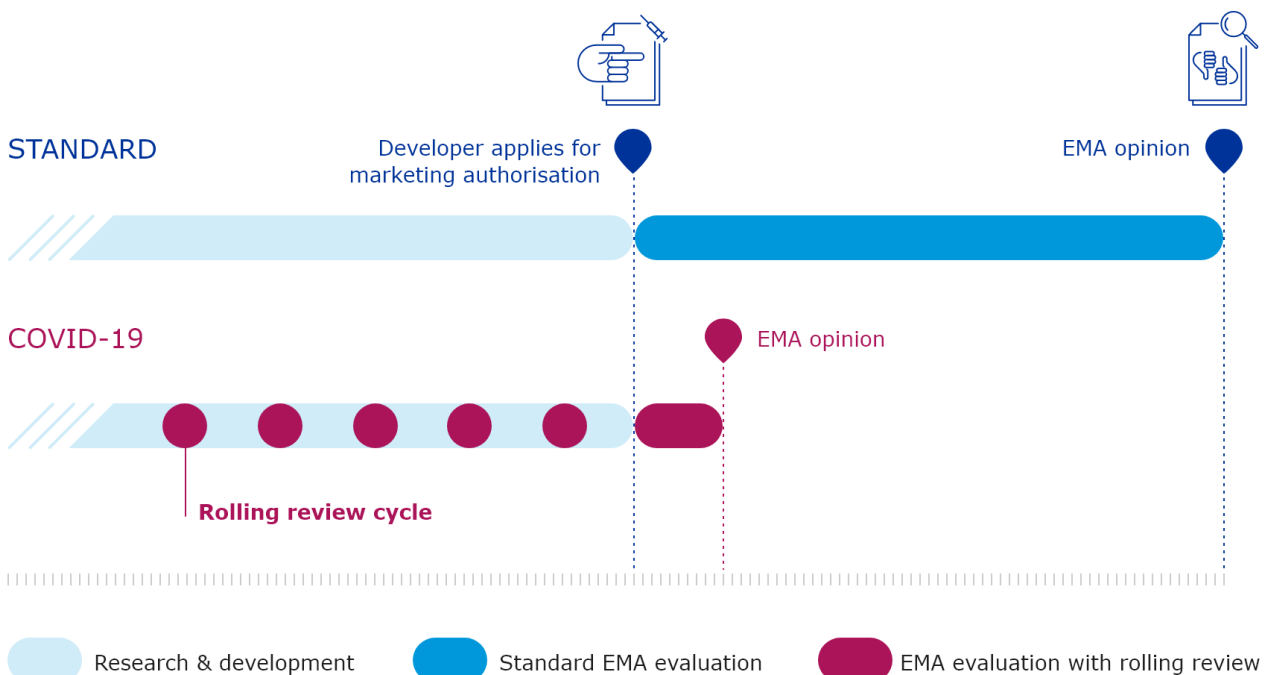

- When an evaluation is complete, EMA has the option of recommending a **conditional marketing authorisation**, a type of approval for medicines addressing unmet medical needs, and in particular those to be used in emergency situations in response to public health threats recognised by the WHO or the EU:
- ✓ This type of approval can be granted if, despite the available data being not as extensive as normally required for an approval, the benefits of faster access to a potentially life-saving medicine outweigh the risks of having less comprehensive data. Approval can then be granted on the condition that the company will supply the additional complementary information within defined timelines, including the results of further studies, once the vaccine is on the market.
- ✓ The data required for a conditional marketing authorisation for a vaccine will vary case by case. Often in an emergency situation the data that need to be supplied after marketing will be from clinical studies as well from observational studies investigating effectiveness and safety.
- ✓ Some pharmaceutical (quality) or non-clinical data (from studies in animals or in a laboratory) may be provided later as well, for example, studies on long term stability and for how long animals are immune can be provided later, while other key studies to prove quality and safety must be provided initially.
- ✓ What data is essential before approval (e.g. during rolling review) and what can be provided afterwards will depend on the individual vaccine and its balance of benefits and risks, taking into account factors such as what is known about that type of vaccine.
- ✓ Where it is agreed that specific pharmaceutical, clinical or non-clinical data may be provided later on, the data that is provided must still sufficiently support a positive benefit/ risk evaluation.

### III. Monitoring safety and how well COVID-19 vaccines work in real life

- Like any medicine, vaccines have benefits and risks, and although highly effective, no vaccine is 100 percent effective in preventing a disease or 100 percent safe in all vaccinated people.
- Because vaccines are given to otherwise healthy people, clinical data are needed to demonstrate that the benefits are far greater than any side effect or potential risks.
- The safety requirements for COVID-19 vaccines are the same as for any other vaccine in the EU and will not be lowered in the context of the pandemic.
- Before a vaccine is approved for use, the main body of evidence for its safety and efficacy (how well the vaccine works as measured in clinical trials) comes from the results of controlled randomised clinical trials, where participants are selected based on specific entry criteria, randomly allocated to vaccination and followed up under controlled conditions in line with strict protocols.
- After authorisation the vaccine will be used in a larger number of people ('real-life' patients). Certain side effects, particularly rare or very rare ones, may only emerge, for example, when millions of people are vaccinated. EU law therefore requires that the safety of all medicines, including vaccines, is monitored while they are in use.
- How well the vaccine works in these real-life settings, for example at a wider population level, is called 'effectiveness'. Studies collecting effectiveness data would give additional information, for example, on long term protection or on the need for and timing of booster doses, to complement the 'efficacy' data obtained in clinical trials.

241 **Standard monitoring**

- 242 • The EU has a comprehensive safety monitoring and risk management (pharmacovigilance) system,  
243 which ensures measures are in place for:
- 244 ○ providing advice to minimise risk;
  - 245 ○ reporting suspected side effects;
  - 246 ○ conducting studies after marketing;
  - 247 ○ detecting any potential adverse effects;
  - 248 ○ conducting rigorous scientific assessments of all safety data;
  - 249 ○ introducing any necessary mitigating actions early on.
- 250 • Competent authorities carry out safety and efficacy studies after marketing and can require a  
251 company to carry out studies as an obligation of the authorisation. Public authorities responsible  
252 for vaccination programmes will conduct other studies.
- 253 • Studies collecting effectiveness data give additional information, for example, on long term  
254 protection or on the need for and timing of booster doses, to complement the efficacy data.

255 **Large scale monitoring activities in the pandemic context**

- 256 • Regulators and vaccine developers are mobilising extra resources to monitor safety and manage  
257 risk in the pandemic. Although large numbers of people will receive COVID-19 vaccines in clinical  
258 trials, this is important because exceptionally large numbers of people are expected to receive  
259 them once authorised.
- 260 • The pharmacovigilance plan for COVID-19 vaccines sets out how EMA and the national competent  
261 authorities in the EU Member States identify and evaluate any new information that arises  
262 promptly, including any safety signals that are relevant for the benefit-risk balance of these  
263 vaccine: [https://www.ema.europa.eu/en/documents/other/pharmacovigilance-plan-eu-regulatory-](https://www.ema.europa.eu/en/documents/other/pharmacovigilance-plan-eu-regulatory-network-covid-19-vaccines_en.pdf)  
264 [network-covid-19-vaccines\\_en.pdf](https://www.ema.europa.eu/en/documents/other/pharmacovigilance-plan-eu-regulatory-network-covid-19-vaccines_en.pdf)
- 265 • This plan also ensures that regulators can take any appropriate regulatory actions and  
266 communicate these to the public as quickly as possible.
- 267 • The monitoring activities in the plan apply to all vaccines, but they take place on a larger scale  
268 during this pandemic:
- 269 ○ Collecting exposure data to COVID-19 vaccines
  - 270 ○ Adopting specific safety signal detection and management measures
  - 271 ○ Setting up a [European infrastructure for monitoring COVID-19 treatments and vaccines](#)
  - 272 ○ [Using real-world data from clinical practice](#)
  - 273 ○ Applying exceptional transparency measures
- 274 • EMA's guidance on preparing risk management plans for COVID-19 vaccines helps companies to  
275 develop risk management plans for COVID-19 vaccines: [Guidance on risk management plans for](#)  
276 [COVID-19 vaccines](#).
- 277 • The risk management plan (RMP) is a document that details information about any possible (known  
278 or potential) safety concerns with the vaccine, the way risks will be managed and monitored once  
279 the vaccine is authorised and what information is intended to be gathered from follow-up studies.

280 The RMP plans sets out how the company will monitor and report on safety and how it will  
281 characterise and manage risks following authorisation of a COVID-19 vaccine and is evaluated by  
282 EMA's safety committee, PRAC.

- 283 • Companies need to submit monthly safety reporting summaries for COVID-19 vaccines, in addition  
284 to periodic safety update reports, and put processes in place to manage a high volume of safety  
285 reports. They need to carry out further studies on COVID-19 vaccines that receive a conditional  
286 marketing authorisation.
- 287 • Additional considerations in this guidance address traceability tools that can help record who has  
288 received which vaccine and from which batch.
- 289 • EMA publishes the full body of the risk management plans (plus Annex 4) for all authorised COVID -  
290 19 vaccines, in line with its exceptional transparency measures for COVID-19 medicines:  
291 [https://www.ema.europa.eu/en/human-regulatory/overview/public-health-threats/coronavirus-](https://www.ema.europa.eu/en/human-regulatory/overview/public-health-threats/coronavirus-disease-covid-19/treatments-vaccines/transparency-exceptional-measures-covid-19-medicines)  
292 [disease-covid-19/treatments-vaccines/transparency-exceptional-measures-covid-19-medicines](https://www.ema.europa.eu/en/human-regulatory/overview/public-health-threats/coronavirus-disease-covid-19/treatments-vaccines/transparency-exceptional-measures-covid-19-medicines)
